# Supplementary material for: One-dimensional MOF-derived magnetic composites for efficient microwave absorption at ultralow thickness through controllable hydrogen reduction
Source: Royal Society of Chemistry journal article supplement (doi:10.1039/d2dt00113f), 2022-01-01
Supplement: d2dt00113f1.pdf [file d2dt00113f1.pdf]

## Supporting Information

### One-dimensional MOFs-derived magnetic composites for efficient microwave absorption at ultralow thickness through controllable hydrogen reduction

Wei Liu,<sup>‡ab</sup> Pengtao Duan,<sup>‡ab</sup> Yue Ding,<sup>ab</sup> Bowei Zhang,<sup>ab</sup> Hailin Su,<sup>\*abcd</sup> Xuebin Zhang,<sup>\*abcd</sup> Jingzhi Wang,<sup>\*e</sup> and Zhongqiu Zou<sup>cd</sup>

a Engineering Research Center of High Performance Copper Alloy Materials and Processing, Ministry of Education, Hefei University of Technology, Hefei, 230009, China

b School of Materials Science and Engineering and Anhui Provincial Key Laboratory of Advanced Functional Materials and Devices, Hefei University of Technology, Hefei, 230009, China

c Huaian Engineering Research Center of Soft Magnetic Powder Cores and Devices, Jiangsu Red Magnetic Materials Incorporation, Huaian, 211700, China

d Anhui Red Magneto-electric Technology Co., Ltd., Wuhu, 241002, China

e School of Materials and Chemistry Engineering, Ningbo University of Technology, Ningbo, 315211, China

<sup>‡</sup> These authors contributed equally to this work.

#### Corresponding Author

Email: hailinsu@hfut.edu.cn; zhxb@hfut.edu.cn; wangjz@nbut.edu.cn

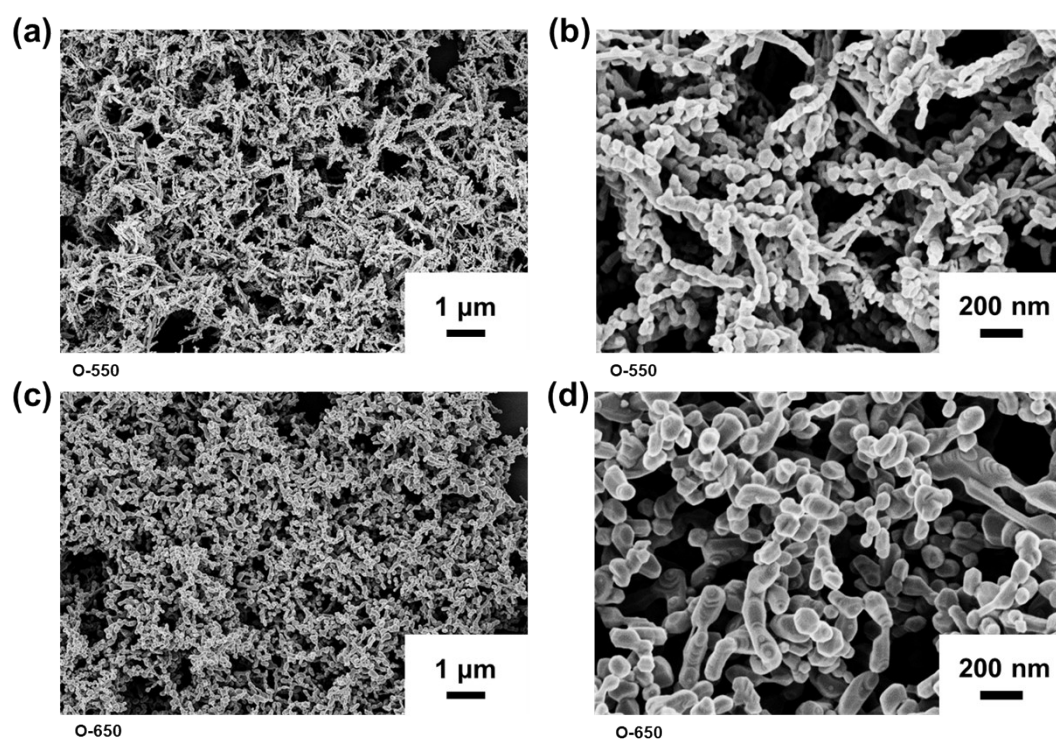

**Fig. S1** SEM images of (a-b) O-550, (c-d) O-650.

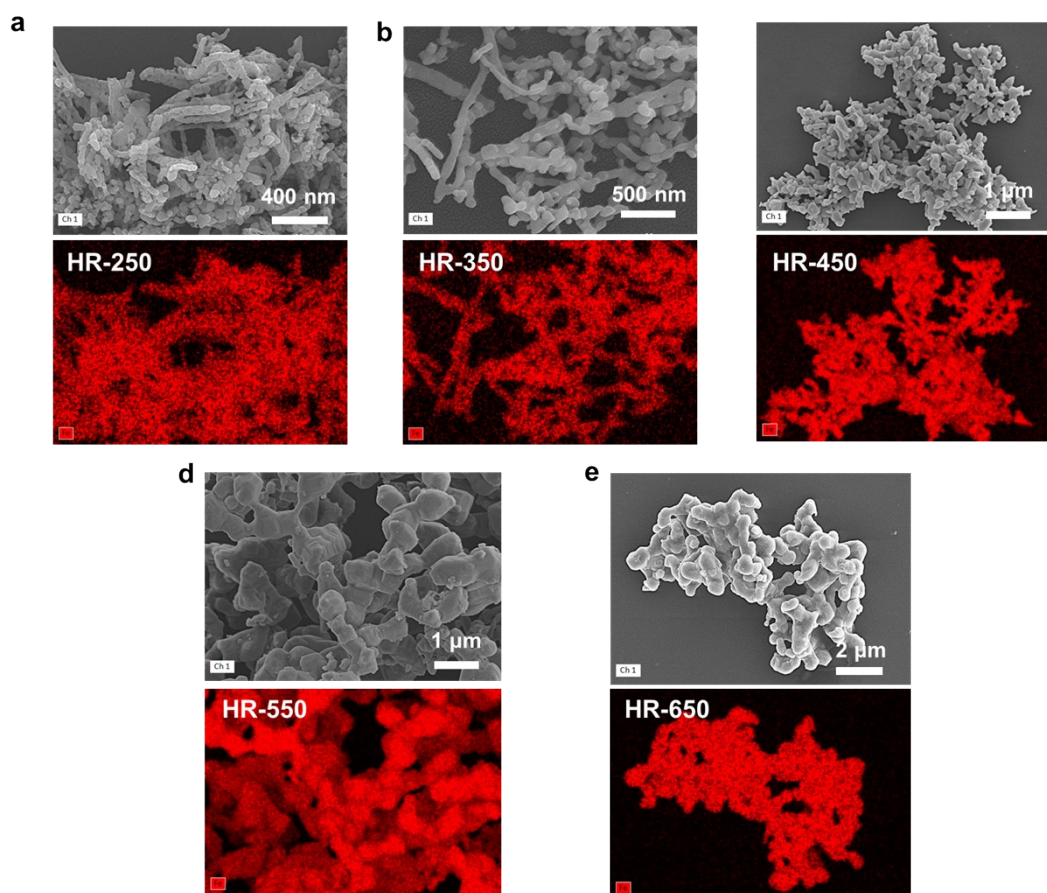

**Fig. S2** Elemental mapping of (a) HR-250, (b) HR-350, (c) HR-450, (d) HR-550 and (e) HR-650.

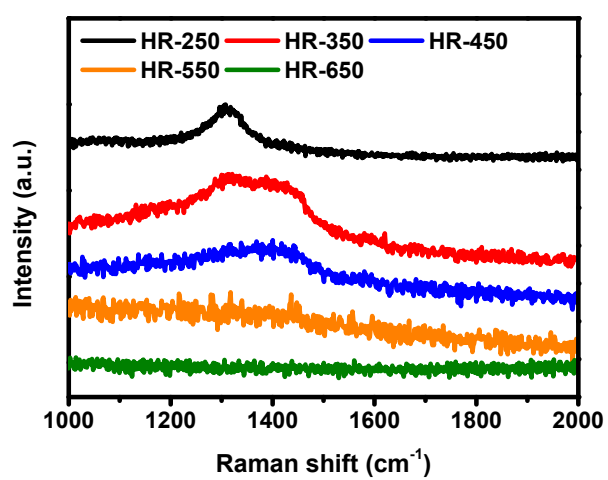

**Fig. S3** Raman spectra of reduced products.

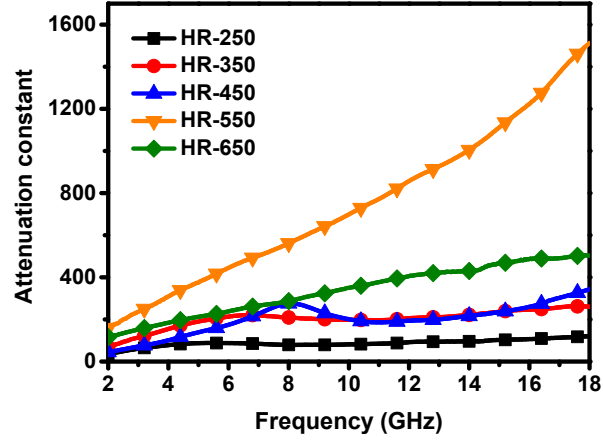

Fig. S4 Attenuation constants curves of reduced products.

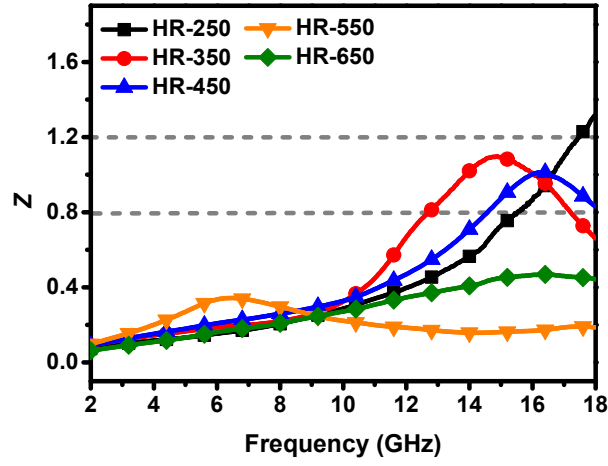

Fig. S5  $|Z_{in}/Z_0|$  values as a function of frequency of reduced products.
